# Supplementary material for: Multiple Sclerosis: Destruction and Regeneration of Astrocytes in Acute Lesions
Source: PubMed Central journal article supplement — J Neuropathol Exp Neurol. 2019 Jan 3;78(2):140–56. doi: 10.1093/jnen/nly121 (PMC6330170; doi:10.1093/jnen/nly121), 2019-01-03
Supplement: nly121_supp.pdf [file nly121_supp.pdf]

## Supplementary Material

Fig S1

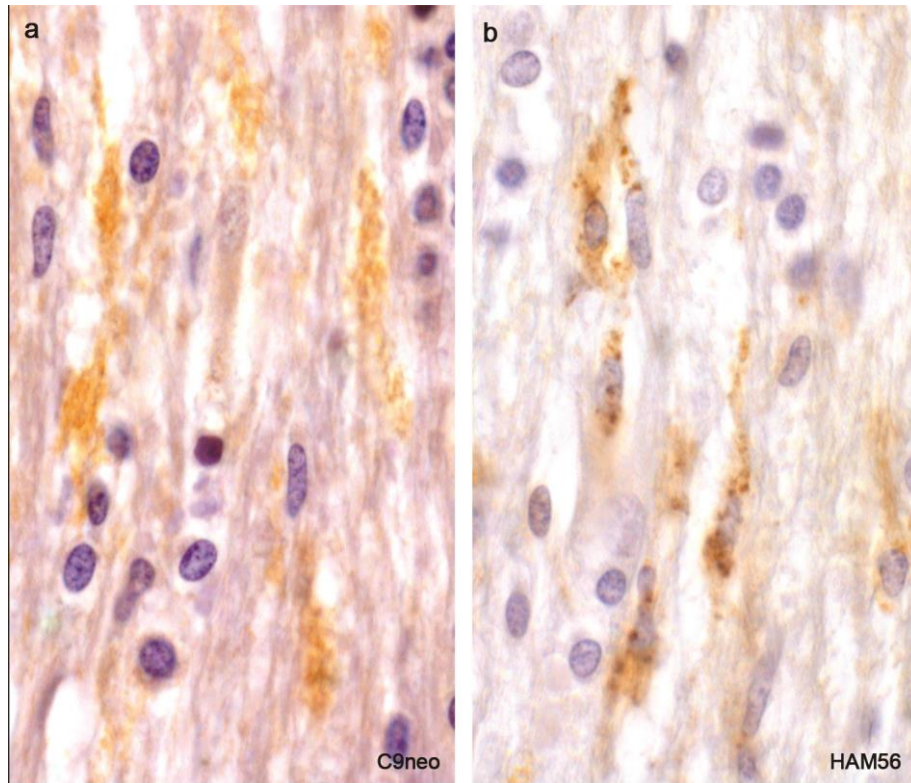

**Supplementary Figure S1 Prephagocytosis - complement deposition.** **a:** Intact myelin sheaths stain positively for membrane attack complex C9neo. There is a cell with a pyknotic nucleus in the center of the field – possibly a dead oligodendrocyte. The several cells present with small elongated nuclei are ramified microglia with activated morphology (enlarged nuclei). **b:** A skip serial section of the same lesion shows small microglia/macrophages in the same area. There are no cells present with the morphology of monocytes. (Case 5- plaque1. **a** C9neo. **b** HAM56. **ab** x1000)

**Fig S2**

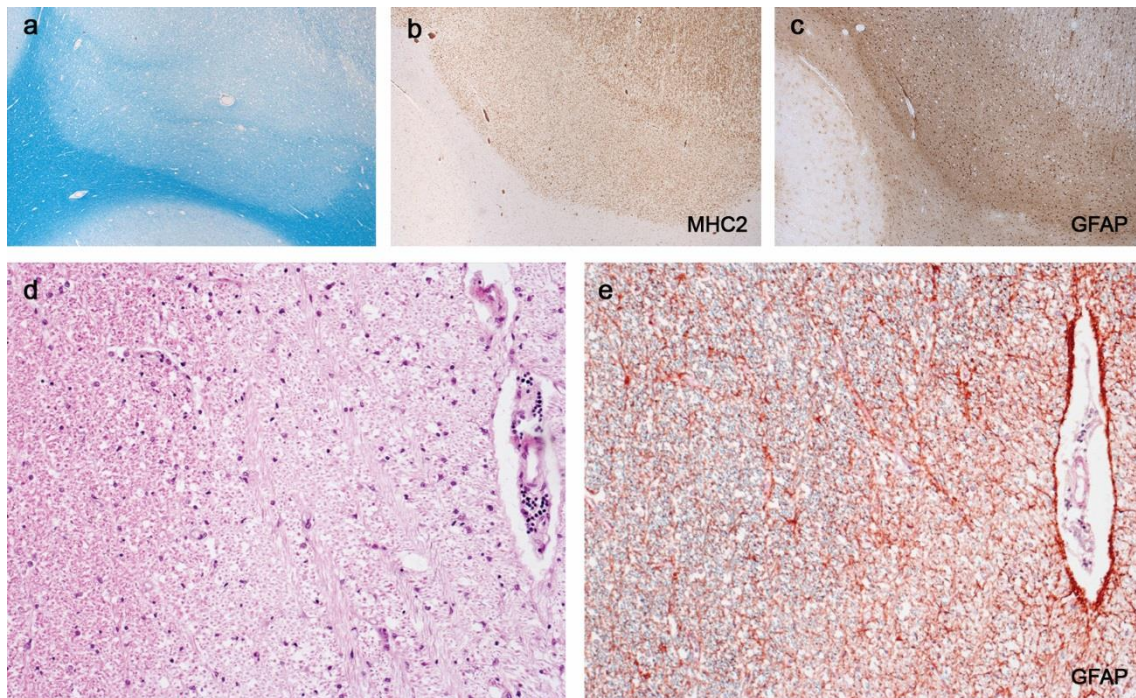

**Supplementary Figure S2 Prephagocytosis. abc:** The expanding edge of an active plaque in Case 2. Extension into the surrounding intact tissue is in the form of a band of pale myelin (**a**) that stains positively for MHC2+ ramified microglia (**b**) and enlarged GFAP+ astrocytes (**c**). **de:** The caudal end of a 14mm long fatal medullary lesion in Case 9 (Index Case 9, plaque 1) appears pale in a section stained using HE (**d**) and stains normally for GFAP (**e**). A previously reported study of this lesion noted a complete absence of oligodendrocytes in the lesion, with numerous pyknotic oligodendrocytes in the surrounding intact (prephagocytic) tissue (APD Henderson et al Ann Neurol 2009;66:739-753). (**abc** Case 2 **a** LFB, **b** MHC2, **c** GFAP. **abc** x9. **de** Case 9 **d** HE, **e** GFAP **de** x116).

**Fig S3**

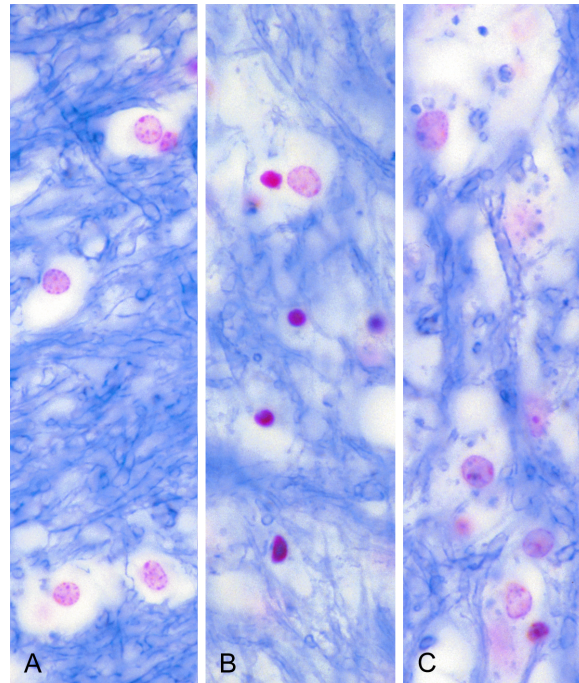

**Supplementary Figure S3 Prephagocytosis - oligodendrocyte pyknosis.** A stain that colours nuclear chromatin red has been used to identify nuclei in tissue where myelin is stained blue. A: Tissue remote from the plaque shows normal appearing oligodendrocyte nuclei. B: Oligodendrocytes with pyknotic nuclei located in intact myelinated tissue immediately bordering the plaque. C: Adjacent area of commencing myelin destruction. (Luxol fast blue periodic acid-Schiff with nuclear fast red counterstain x630)

Fig S4

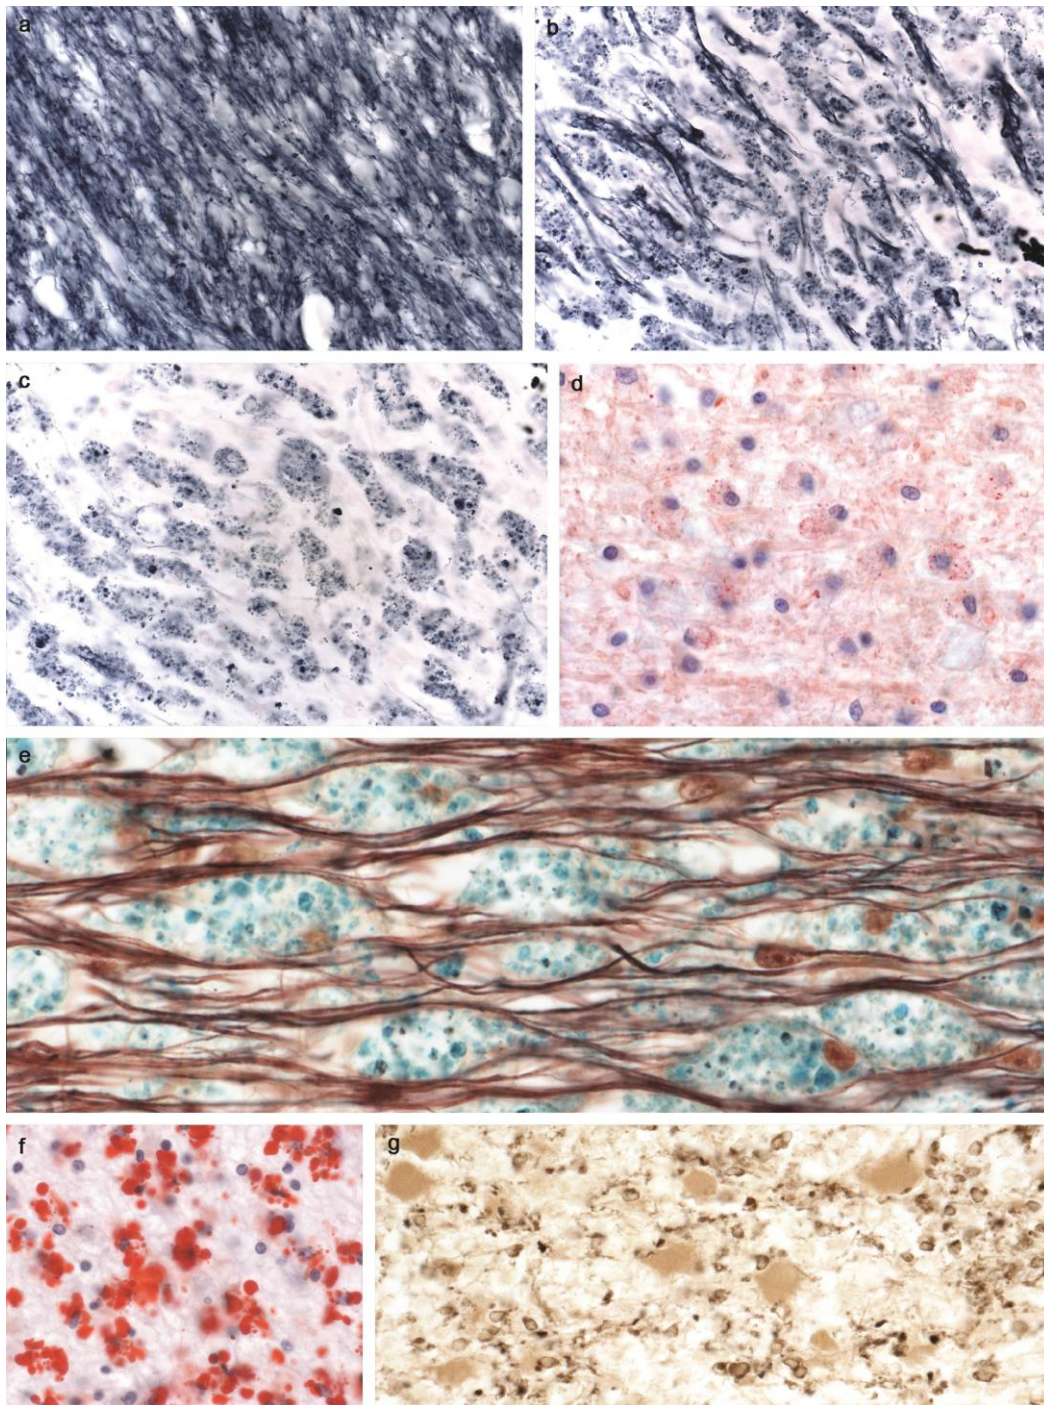

**Supplementary Figure S4 Staging macrophage activity.** **a:** Commencing myelin ball formation (prephagocytic). **b:** Active myelin breakdown (phagocytic). **c:** Immediate postphagocytic (myelin loss complete, macrophage contents LFB+, MBP+, MOG+). **d:** Immediate postphagocytic tissue stained for neutral lipids (phagocytosed myelin Oil Red O negative). **e:** Immediate postphagocytic tissue stained for myelin and axons. **f:** Classical hypercellular postphagocytic tissue stained using Oil Red O. **g:** Classical hypercellular postphagocytic tissue stained for HNK-1 (numerous unstained large-body astrocytes; numerous HNK-1+ immature oligodendrocytes). (**abc** Case 4 LFB x250. **d** Case 6 Oil Red O x500. **e** Case 5 Bodian/LFB x760. **f:** Case 17 Oil Red O x380. **g:** Case 14 HNK-1 (immunogold-silver) x300).



Fig S5

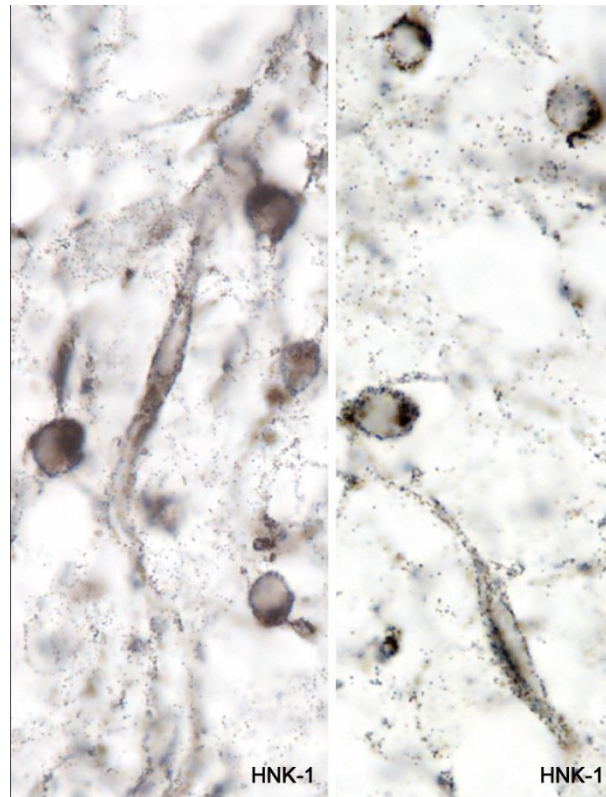

**Supplementary Figure S5. HNK1+ precursor astrocytes and oligodendrocytes. ab:** Recently demyelinated tissue. (**ab** Case 6, plaque 1 HNK-1 x740)

**Fig S6**

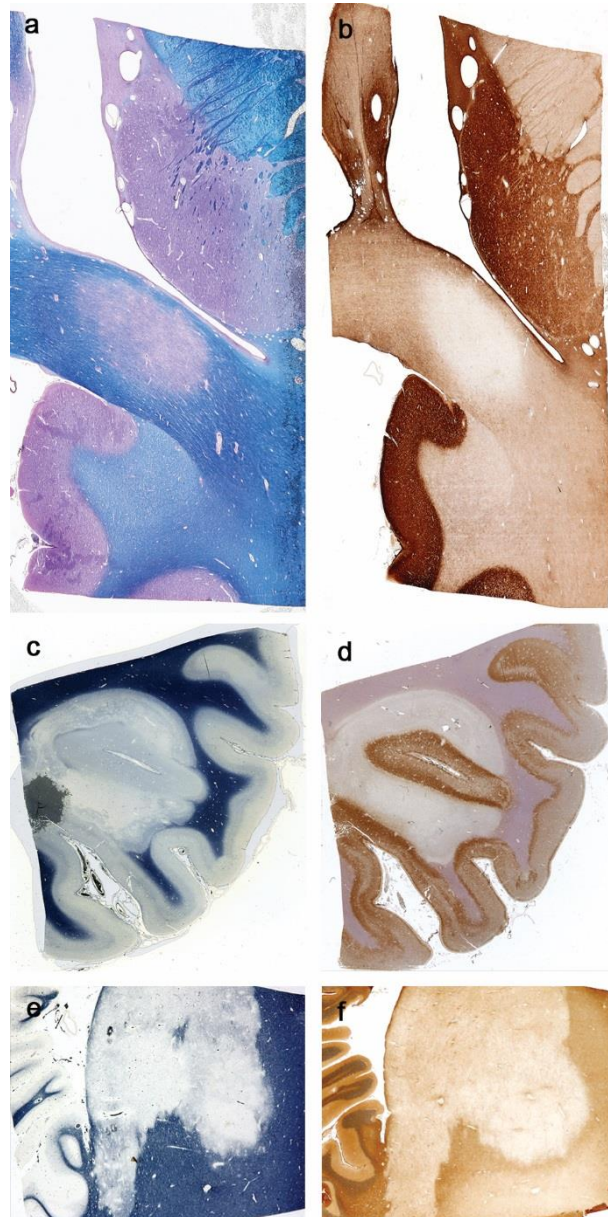

**Supplementary Figure S6 AQP4 – negative actively demyelinated plaques.** The loss of AQP4 immunoreactivity is restricted to demyelinated tissue. This is an important difference between NMO and MS early lesions. NMO lesions show AQP4 loss extending into still-myelinated tissue. (**ab** corpus callosum lesion Case 9. **a** LFB-PAS, **b** AQP4 **ab** x2.7; **cd** Case 6. **c** LFB. **d** AQP4. **cd** x1.4. **ef** Case 4, plaque 1. **e** LFB. **f** AQP4. **ef** x2.6).

**Fig S7**

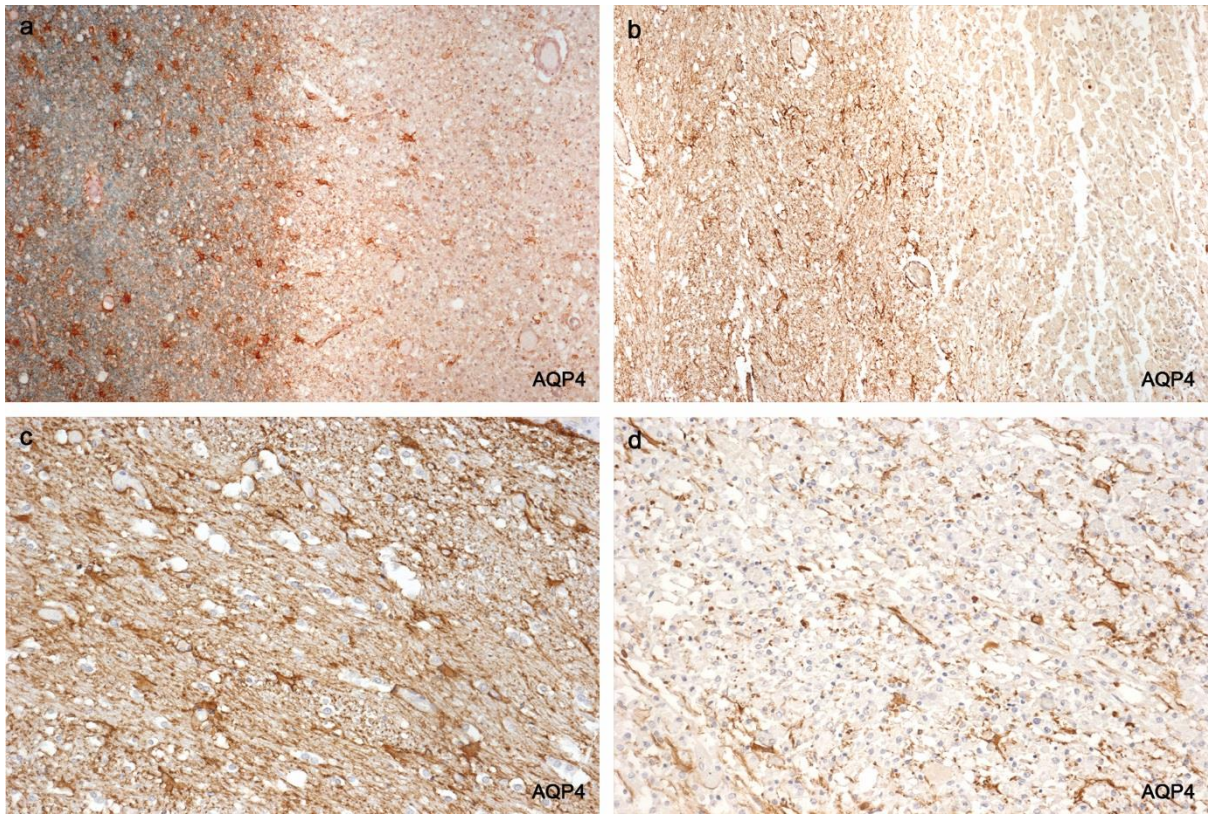

**Supplementary Figure S7 Loss of AQP4-positive stellate astrocytes** **a:** Case 6 plaque 1. **b:** Case 3, a second actively demyelinating plaque. **cd:** Intact border (**c**) and edge (**d**) of a recently active plaque in a 68 year old female patient with clinically active disease. (**a** Case 6 plaque 1 AQP4. **b** Case 3 plaque 1 AQP4. **cd** AQP4. **ab** x60 **cd** x100)



**Fig S8**

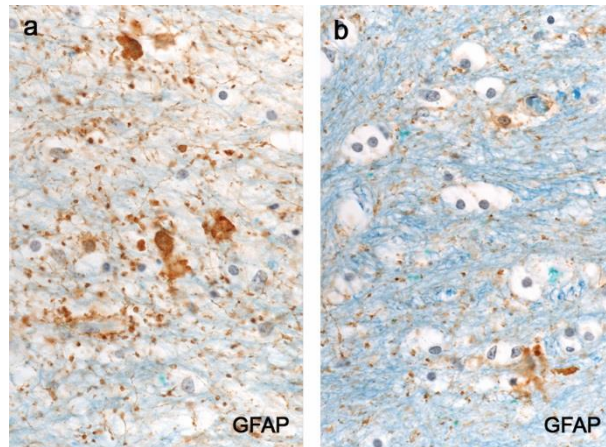

**Supplementary Figure S8. Clasmotodendrosis ab:** In otherwise normal tissue remote from any visible plaque, GFAP+ astrocyte cell bodies and fibrous processes have fragmented to form small nodules and dust-like particle. Myelin sheaths are intact and there is no apparent loss of oligodendrocytes. (**ab** Case 1 LFB/GFAP x180)

**Fig S9**

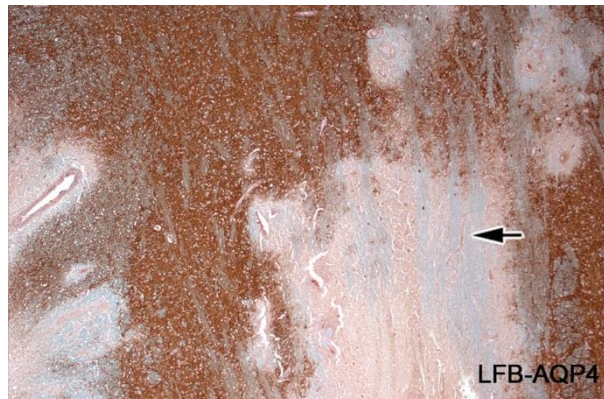

**Supplementary Figure S9. Neuromyelitis optica.** A non-necrotic still- myelinated plaque and surrounding still- myelinated perivascular lesions show a complete absence of AQP4 immunoreactivity. The vessel indicated by the arrow is shown at higher magnification in **Supplementary Figure S9.** (LFB-PAS/AQP4 **x16**).

Fig S10

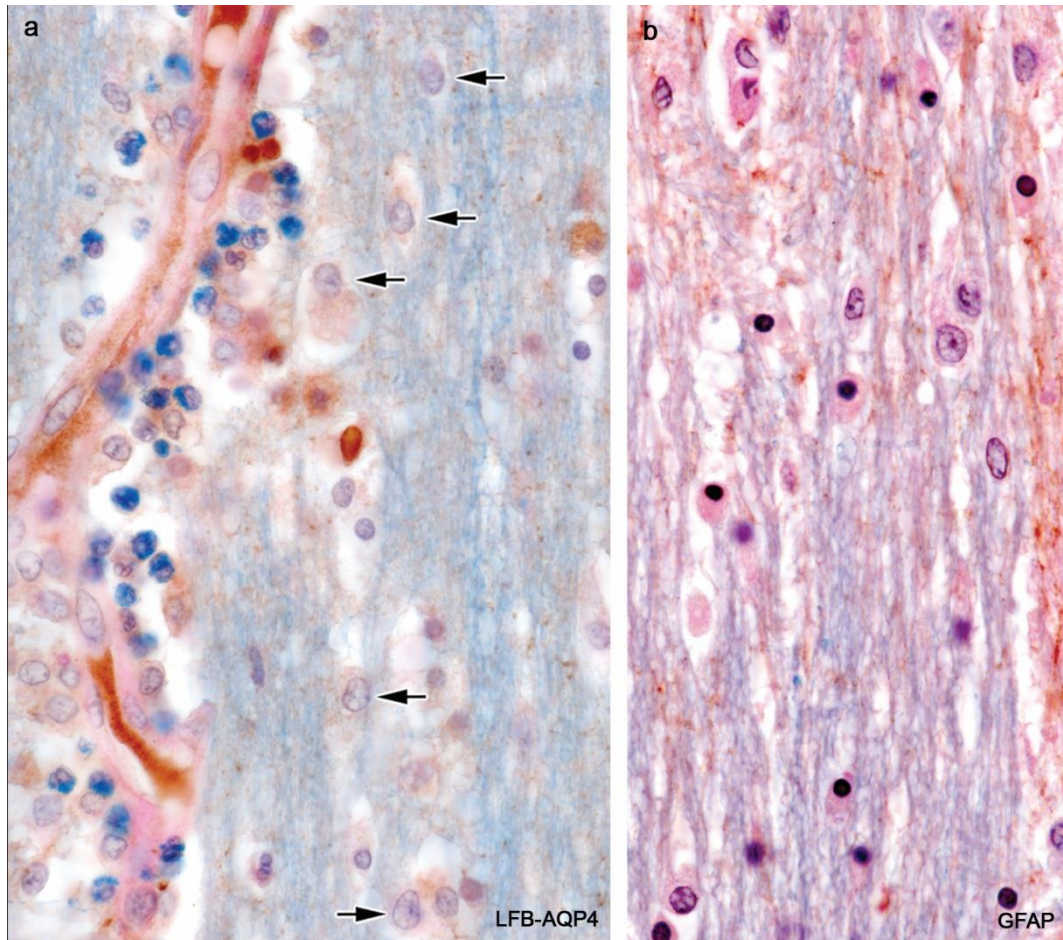

**Supplementary Figure S10. Neuromyelitis optica.** **a:** A magnified view of the area indicated by the arrow in **Supplementary Figure S8**. Myelin sheaths are pale but intact, oligodendrocytes are difficult to identify and there are a number of macrophages amongst the myelinated fibers (**arrows**). There are no AQP4+ astrocytes present. The perivascular space is packed with eosinophils (eosinophils stain blue in LFB-PAS stained sections). **b:** Another still-myelinated early, non-necrotic NMO lesion, in this instance stained for GFAP. There are no GFAP+ astrocytes present. Macrophages of normal appearance are present amongst the myelinated fibers. Oligodendrocytes have pyknotic nuclei, compact eosinophilic cytoplasm, and lack the fluid-filled 'halo' normally seen around oligodendrocyte nuclei in tissue obtained at autopsy. (**a** LFB-PAS/AQP4. **b** HE/ GFAP. **ab** x680)
